# Supplementary material
Source: PubMed Central journal article supplement (PMC6295419)
Supplement: NIHMS993974-supplement-Supp_TableS2.pdf [file NIHMS993974-supplement-Supp_TableS2.pdf]

| All KCTD7 mutations for bi-allelic KCTD7 patients and family members |          |               |                       |                                |                   |                                      |
|----------------------------------------------------------------------|----------|---------------|-----------------------|--------------------------------|-------------------|--------------------------------------|
| All new and published patient mutations                              |          |               |                       | Sequenced family members       |                   |                                      |
| Patient number                                                       | Zygosity | Nucleotide    | Protein               | Parent mutations affecting CpG | Mother            | Father                               |
| 1                                                                    | Cmpd het | c.190A>G      | T6A                   | gain CpG                       | het c.631C>T      | het c.190A>G                         |
| 2                                                                    | Cmpd het | c.208C>T      | R70W                  | lost CpG                       | het c.251G>A      | het c.208C>T                         |
| 3                                                                    | Cmpd het | c.250C>T      | R84W                  | lost CpG                       | het del Exon3-4   | het c.250C>T                         |
| 2                                                                    | Cmpd het | c.251G>A      | R84Q                  | lost CpG                       | het c.251G>A      | het c.208C>T                         |
| 4,5                                                                  | Homz     | c.280C>T      | R94W                  | lost CpG                       | het c.280C>T      | het c.280C>T                         |
| 6,7,8                                                                | Homz     | c.295C>T      | R99X stop             | lost CpG                       | het c.295C>T (2)  | het c.295C>T (2)                     |
| 9,10                                                                 | Cmpd het | c.314G>A      | G105E                 | lost CpG                       | het c.314G>A      | het c.314G>A (1 normal sib)          |
| 3                                                                    | Cmpd het | del Ex3-4     | D106 fs               | lost CpG                       | het del Ex3-4     | het c.290C>T                         |
| 11,12,13                                                             | Homz     | c.322C>A      | L108M                 | lost CpG                       | het c.322C>A      | het c.322C>A                         |
| 14                                                                   | Homz     | c.334C>T      | R122C                 | lost CpG                       | het c.334C>T      | het c.334C>T                         |
| 9,10                                                                 | Cmpd het | c.341G>A      | G114E                 | lost CpG                       | het c.341G>A      | het c.341G>A                         |
| 15                                                                   | Cmpd het | c.343G>T      | D115Y                 | lost CpG                       | not reported      | +                                    |
| 16,17                                                                | Cmpd het | c.362G>T      | R121L                 | lost CpG                       | het c.704G>C      | het c.362G>T (4 healthy sibs)        |
| 18                                                                   | Homz     | c.458G>A      | R153H                 | lost CpG                       | het c.458G>A      | het c.458G>A (1 normal sib)          |
| 19                                                                   | Cmpd het | c.530G>A      | R177H                 | lost CpG                       | het c.530G>A      | het c.533C>T                         |
| 19                                                                   | Cmpd het | c.533C>T      | A178V                 | lost CpG                       | het c.530G>A      | het c.533C>T                         |
| 20,21                                                                | Homz     | c.536_543 del | V179 R <sup>1/2</sup> | lost CpG                       | de novo           | +                                    |
| 22                                                                   | Cmpd het | c.541C>T      | R181W                 | lost CpG                       | het c.685G>T      | het c.541C>T                         |
| 23,24                                                                | Homz     | c.550C>T      | R184C                 | lost CpG                       | het c.550C>T      | het c.550C>T (2)                     |
| 25,26                                                                | Homz     | c.594delC     | I199 fs               | lost CpG                       | het c.594delC (2) | het c.594delC (2) (1 parent by cons) |
| 27                                                                   | Cmpd het | c.614C>T      | P205L                 | lost CpG                       | het c.776T>A      | het c.614C>T                         |
| 1                                                                    | Cmpd het | c.631C>T      | R211X stop            | lost CpG                       | het c.631C>T      | het c.190A>G                         |
| 22                                                                   | Cmpd het | c.685G>T      | D229Y                 | lost CpG                       | het c.685G>T      | het c.541C>T                         |
| 28,29                                                                | Cmpd het | c.685G>T      | D229Y                 | lost CpG                       | het c.812T>A      | het c.685G>T                         |
| 30,31                                                                | Homz     | c.696delT     | F232 fs               | gain CpG                       | het c.696delT     | het c.696delT                        |
| 16,17                                                                | Cmpd het | c.704G>C      | W235S                 | gain CpG                       | het c.704G>C      | het c.362G>T                         |
| 27                                                                   | Cmpd het | c.776T>A      | V259E                 | gain CpG                       | het c.776T>A      | het c.614C>T                         |
| 28,29                                                                | Cmpd het | c.812T>A      | L271H                 | gain CpG                       | het c.812T>A      | het c.685G>T                         |
| 15                                                                   | Cmpd het | c.818A>T      | N273I                 | gain CpG                       | not reported      | +                                    |
| 32                                                                   | Homz     | c.818A>T      | N273I                 | gain CpG                       | het c.818A>T      | het c.818A>T                         |
| 33,34,35                                                             | Homz     | c.827A>G      | Y276C                 | gain CpG                       | het c.827A>G      | het c.827A>G                         |
| 36,37                                                                | Homz     | c.861_863 del | W289X                 | gain CpG                       | consanguineous    | 3 het 1WT sib                        |
| 30 unique DNA mutations<br>18 new mutations this study               |          |               |                       | Total: 25                      | Total: 67         |                                      |

| Predicted effects of patient mutations on disease pathogenesis |                   |            |                   |                  |            |            |
|----------------------------------------------------------------|-------------------|------------|-------------------|------------------|------------|------------|
| Phenotype predictions                                          |                   |            |                   | SIFT predictions |            |            |
| PolyPhen2                                                      | HumDiv            | PolyPhen2  | HumVar            | Score            | Prediction | Score      |
| 0.999                                                          | Probably damaging | 0.586      | Probably damaging | 0                | Damaging   | -4.693     |
| 0.998                                                          | Probably damaging | 0.849      | Possibly damaging | 0.03             | Damaging   | -6.175     |
| 0.615                                                          | Possibly damaging | 0.166      | Benign            | 0                | Damaging   | -4.869     |
| 1.000                                                          | Probably damaging | 0.999      | Probably damaging | 0                | Damaging   | -0.984     |
| 0.990                                                          | Probably damaging | 0.989      | Probably damaging | 0.16             | Tolerated  | -0.984     |
| 0.125                                                          | Benign            | 0.094      | Benign            | 0.37             | Tolerated  | -6.917     |
| Stop                                                           | Stop              | Stop       | Stop              | Stop             | Stop       | Stop       |
| 0.588                                                          | Possibly damaging | 0.475      | Possibly damaging | 0.97             | Tolerated  | -2.346     |
| 1.000                                                          | Probably damaging | 1.000      | Probably damaging | 0                | Damaging   | -1.965     |
| 1.000                                                          | Probably damaging | 1.000      | Probably damaging | 0                | Damaging   | -7.8       |
| 0.774                                                          | Possibly damaging | 0.678      | Possibly damaging | 0.19             | Tolerated  | -1.943     |
| 0.142                                                          | Benign            | 0.216      | Benign            | 0.02             | Damaging   | -2.893     |
| 0.996                                                          | Probably damaging | 0.951      | Probably damaging | 0.12             | Damaging   | -4.638     |
| 0.141                                                          | Benign            | 0.112      | Benign            | 0.03             | Damaging   | -4.638     |
| 0.029                                                          | Benign            | 0.097      | Benign            | 0.51             | Tolerated  | -0.245     |
| 0.313                                                          | Benign            | 0.019      | Benign            | 0.07             | Tolerated  | -1.183     |
| 0.919                                                          | Possibly damaging | 0.279      | Benign            | 0.07             | Tolerated  | -2.683     |
| 0.996                                                          | Probably damaging | 0.661      | Possibly damaging | 0.19             | Tolerated  | -2.683     |
| 0.901                                                          | Possibly damaging | 0.277      | Benign            | 0.19             | Tolerated  | -2.683     |
| frameshift                                                     | frameshift        | frameshift | frameshift        | frameshift       | frameshift | frameshift |
| 0.915                                                          | Possibly damaging | 0.522      | Possibly damaging | 0.18             | Tolerated  | -0.995     |
| 0.008                                                          | Benign            | 0.004      | Benign            | 0.01             | Damaging   | -4         |
| 1.000                                                          | Probably damaging | 0.985      | Probably damaging | 0.01             | Damaging   | -4         |
| 0.999                                                          | Probably damaging | 0.98       | Probably damaging | 0.23             | Tolerated  | -1.824     |
| 0.999                                                          | Probably damaging | 0.997      | Probably damaging | 0.23             | Tolerated  | -1.824     |
| Stop                                                           | Stop              | Stop       | Stop              | Stop             | Stop       | Stop       |
| 0.993                                                          | Probably damaging | 0.565      | Possibly damaging | 0.11             | Tolerated  | -0.549     |
| 0.996                                                          | Probably damaging | 0.839      | Possibly damaging | 0.11             | Tolerated  | -0.549     |
| 0.999                                                          | Probably damaging | 0.995      | Probably damaging | 0.11             | Tolerated  | -0.549     |
| 0.999                                                          | Probably damaging | 0.995      | Probably damaging | 0.11             | Tolerated  | -0.549     |
| frameshift                                                     | frameshift        | frameshift | frameshift        | frameshift       | frameshift | frameshift |
| 0.998                                                          | Probably damaging | 0.991      | Probably damaging | 0                | Damaging   | -10.267    |
| 0.421                                                          | Benign            | 0.107      | Benign            | 0                | Damaging   | -3.492     |
| 0.999                                                          | Probably damaging | 0.993      | Probably damaging | 0.3              | Tolerated  | -0.387     |
| 0.838                                                          | Possibly damaging | 0.278      | Benign            | 0.04             | Damaging   | -1.52      |
| 0.838                                                          | Possibly damaging | 0.278      | Benign            | 0.04             | Damaging   | -1.52      |
| 0.999                                                          | Probably damaging | 0.990      | Probably damaging | 0.14             | Tolerated  | -1.439     |
| Stop                                                           | Stop              | Stop       | Stop              | Stop             | Stop       | Stop       |

| Family variants also listed at ExAC |         |     |      | Patient mutations present in ExAC |                  | Allele frequency from ExAC |                  | # mult alleles of seq'd family members at ExAC |  |
|-------------------------------------|---------|-----|------|-----------------------------------|------------------|----------------------------|------------------|------------------------------------------------|--|
| Nucleotide                          | Protein | Het | Homz | Present in ExAC                   | Allele frequency | Present in ExAC            | Allele frequency | # mult alleles of seq'd family members at ExAC |  |
| c.190A>G                            | T6A     | 7   | 0    | 1                                 | 0.00007415       | 1                          | 0                | 1                                              |  |
| c.192A>G                            | T6T     | 2   | 0    | 0                                 | 0                | 0                          | 0                | 0                                              |  |
| c.209G>A                            | R70Q    | 2   | 0    | 0                                 | 0.00001648       | 2                          | 0                | 2                                              |  |
| c.250C>T                            | R84W    | 1   | 0    | 1                                 | 0.00008239       | 1                          | 0                | 1                                              |  |
| c.251G>A                            | R84Q    | 1   | 0    | 1                                 | 0.00008239       | 1                          | 0                | 1                                              |  |
| c.280C>T                            | R94W    | 1   | 0    | 1                                 | 0.00008239       | 1                          | 0                | 1                                              |  |
| c.295C>A                            | R99R    | 2   | 0    | 0                                 | 0                | 0                          | 0                | 0                                              |  |
| c.314G>A                            | G105E   | 0   | 0    | 0                                 | 0                | 0                          | 0                | 0                                              |  |
| c.334C>T                            | R122C   | 2   | 0    | 1                                 | 0.00001648       | 2                          | 0                | 2                                              |  |
| c.335G>A                            | R122H   | 1   | 0    | 0                                 | 0                | 0                          | 0                | 0                                              |  |
| c.342G>A                            | G114E   | 1   | 0    | 0                                 | 0.00008239       | 1                          | 0                | 1                                              |  |
| c.361C>T                            | R121C   | 8   | 0    | 0                                 | 0.0000659        | 1                          | 0                | 1                                              |  |
| c.362G>A                            | R121H   | 3   | 0    | 0                                 | 0.00002471       | 1                          | 0                | 1                                              |  |
| c.362G>T                            | R121L   | 1   | 0    | 1                                 | 0.00008238       | 1                          | 0                | 1                                              |  |
| c.457C>G                            | R153G   | 1   | 0    | 0                                 | 0.00008239       | 1                          | 0                | 1                                              |  |
| c.458G>A                            | R153H   | 8   | 0    | 1                                 | 0.00004119       | 2                          | 0                | 2                                              |  |
| c.533C>T                            | A178V   | 3   | 0    | 1                                 | 0.00002474       | 1                          | 0                | 1                                              |  |
| c.534G>A                            | A178A   | 5   | 0    | 0                                 | 0.00004123       | 1                          | 0                | 1                                              |  |
| c.541C>T                            | R181W   | 0   | 0    | 1                                 | 0.00008245       | 1                          | 0                | 1                                              |  |
| c.542G>A                            | R181Q   | 2   | 0    | 0                                 | 0.00001649       | 1                          | 0                | 1                                              |  |
| c.550C>T                            | R184C   | 2   | 0    | 0                                 | 0.00001649       | 4                          | 0                | 4                                              |  |
| c.551G>A                            | R184H   | 1   | 0    | 0                                 | 0.00008243       | 1                          | 0                | 1                                              |  |
| c.614C>T                            | P205L   | 2   | 0    | 1                                 | 0.00001648       | 1                          | 0                | 1                                              |  |
| c.631C>T                            | R211X   | 1   | 0    | 1                                 | 0.00008238       | 1                          | 0                | 1                                              |  |
| c.632G>A                            | R211Q   | 1   | 0    | 0                                 | 0.00008238       | 1                          | 0                | 1                                              |  |
| c.632G>C                            | R211P   | 1   | 0    | 0                                 | 0.00008238       | 1                          | 0                | 1                                              |  |
| c.687T>C                            | D229D   | 17  | 0    | 0                                 | 0.0001401        | 1                          | 0                | 1                                              |  |
| c.812T>A                            | L271H   | 1   | 0    | 1                                 | 0                | 0                          | 0                | 2                                              |  |
| c.827A>G                            | Y276C   | 1   | 0    | 1                                 | 0.00008294       | 6                          | 0                | 6                                              |  |
| c.863G>A                            | W288X   | 1   | 1    | 1                                 | 0.00008395       | 1                          | 0                | 1                                              |  |

last updated Jan. 2018

Key:  
 New KCTD7 patients  
 Published KCTD7 patients  
 KCTD7 patient mutations listed in ExAC for >1 individual  
 Other ExAC mutations at the same codon as patients  
 Patient mutations listed elsewhere in table (not counted in totals)  
 ExAC data source: <http://exac.broadinstitute.org/transcript/ENST00000275532>  
 RozyPhen2: <http://genetics.bwh.harvard.edu/rozy2/>  
 SIFT: [http://sift.bii.a-star.edu.sg/www/SIFT\\_ext\\_submit.html](http://sift.bii.a-star.edu.sg/www/SIFT_ext_submit.html)  
 PROVEAN: [http://provean.jcvi.org/seq\\_submit.php](http://provean.jcvi.org/seq_submit.php)  
[http://provean.jcvi.org/help.php#protein\\_batch\\_input\\_format](http://provean.jcvi.org/help.php#protein_batch_input_format)

| SUMMARY:        | Family members | Genotype       | Number with EPM3 | Description                                                                                                                             |
|-----------------|----------------|----------------|------------------|-----------------------------------------------------------------------------------------------------------------------------------------|
|                 | 41             | hetz           | 0                | sequenced parents                                                                                                                       |
|                 | 1              | hetz           | 0                | sequenced grandparent of patients 23 and 24                                                                                             |
|                 | 8              | hetz           | 0                | sequenced siblings                                                                                                                      |
|                 | 2              | homoz WT       | 0                | sequenced siblings                                                                                                                      |
|                 | 5              | rec. geneology | 0                | four parents (families 15 and 25) with known consanguinity                                                                              |
| <b>Subtotal</b> | <b>57</b>      | <b>ND</b>      | <b>0</b>         | All related family members with genetic evidence                                                                                        |
| Exception:      | 2              | ND             | 0                | Other: known unaffected siblings without sequence data.<br>Parents of published patient 15 (family 11) have no available sequence data. |

NOTES:  
 Note 1: published patient 13 (family 9) is not known to be related to patients 11 and 12 (family 8) based on further communication with author Gilbert (Seaby et al.).  
 Note 2: published patients 6, 7 and 8 are from two nuclear families, four parents known to be related.  
 Note 3: published patients 25 and 26 are reported to have two different sets of parents from different families 18 and 19 (3 were sequenced).
